# Supplementary material for: Photocatalytic production of dihydroxyacetone from glycerol on TiO2in acetonitrile
Source: Royal Society of Chemistry journal article supplement (doi:10.1039/c9ra09434b), 2020-01-01
Supplement: c9ra09434b1.pdf [file c9ra09434b1.pdf]

# **Photocatalytic Production of Dihydroxyacetone from Glycerol on TiO<sub>2</sub> in Acetonitrile**

Alexander Luis Imbault, Jianyu Gong and Ramin Farnood

## **Supplementary Data**

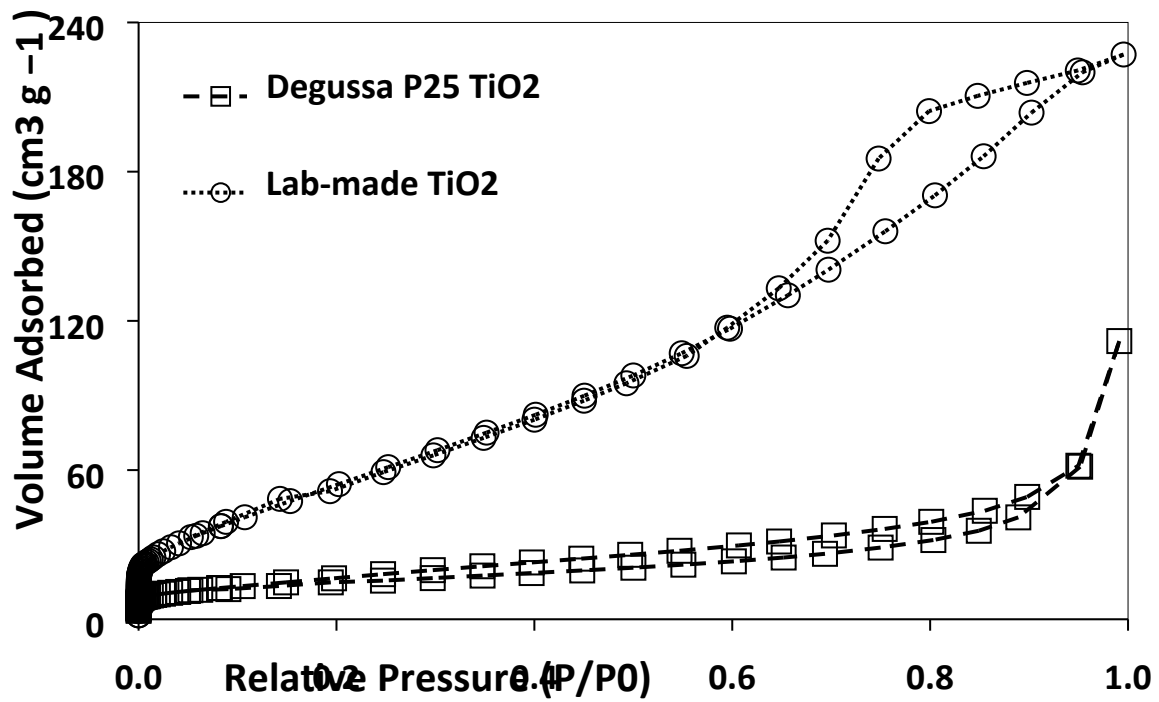

Fig. S. 1. Nitrogen adsorption-desorption isotherms for both Degussa P25 TiO<sub>2</sub> and lab-made TiO<sub>2</sub>.

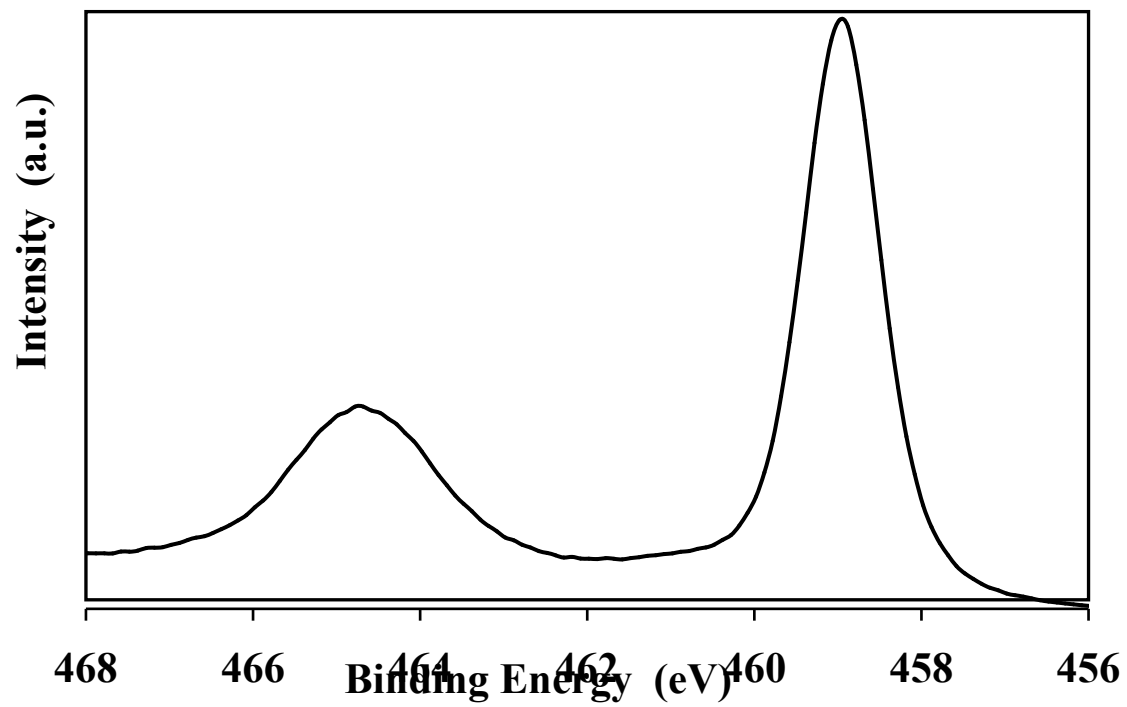

**Fig. S. 2.** High resolution XPS spectrum of lab-made  $\text{TiO}_2$  Ti 2p<sub>3/2</sub> at 458.88 eV and Ti 2p<sub>1/2</sub> 464.68 eV to confirm synthesis of lab-made  $\text{TiO}_2$ .

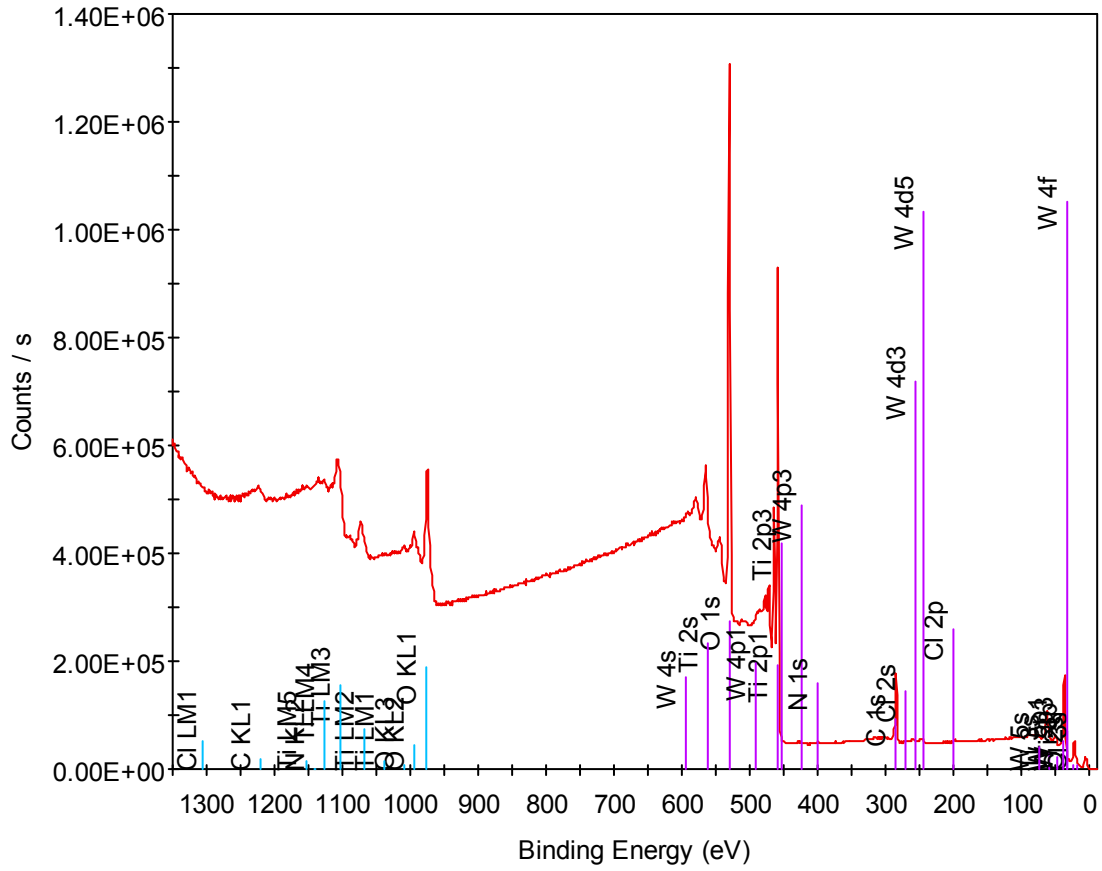

**Fig. S. 3.** Broad scan XPS of lab-made  $\text{TiO}_2$  quantified to contain 27.30% Ti, 55.24% O, 16.39% C, 0.65% N, 0.29% Cl and 0.13% W (atomic percent).

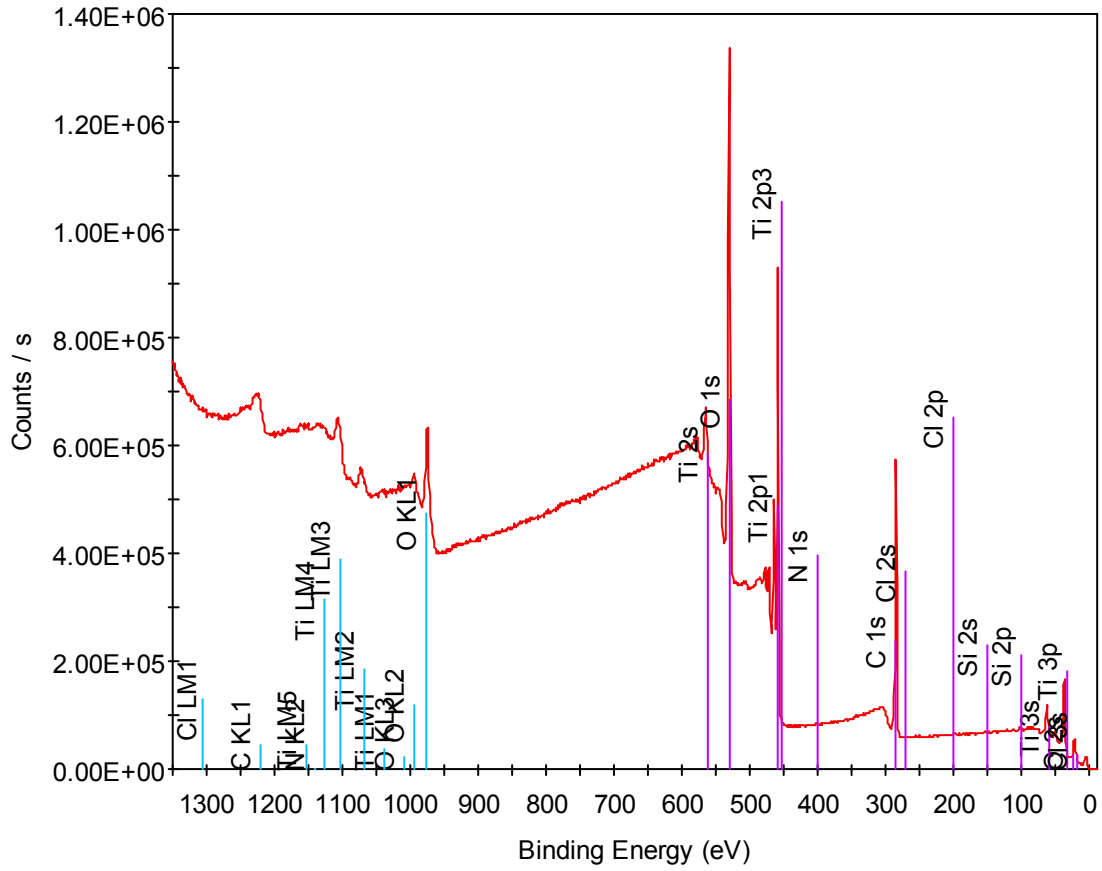

**Fig. S. 4.** Broad scan XPS of as received Degussa P25  $\text{TiO}_2$  quantified to contain 16.15% Ti, 37.30% O, 45.95% C, 0.13% N, 0.16% Cl and 0.31% Si (atomic percent).

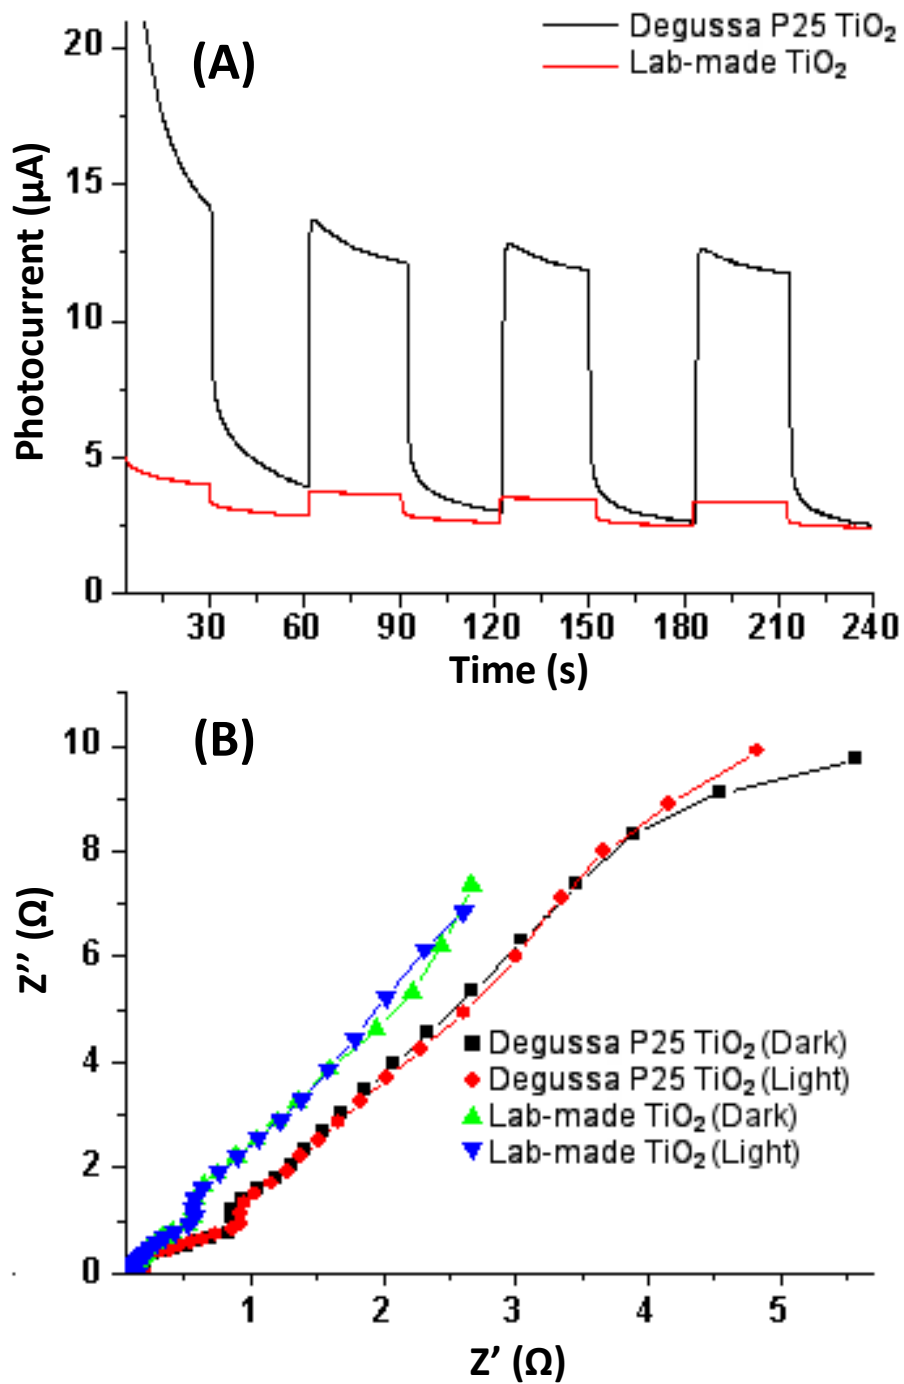

Fig. S. 5. Photocurrent testing in aqueous sodium sulfate solution with applied bias potential (0.8 V, Ref) (A), and EIS test in sodium sulfate solution with applied bias potential (0.8V, Ref) (B).

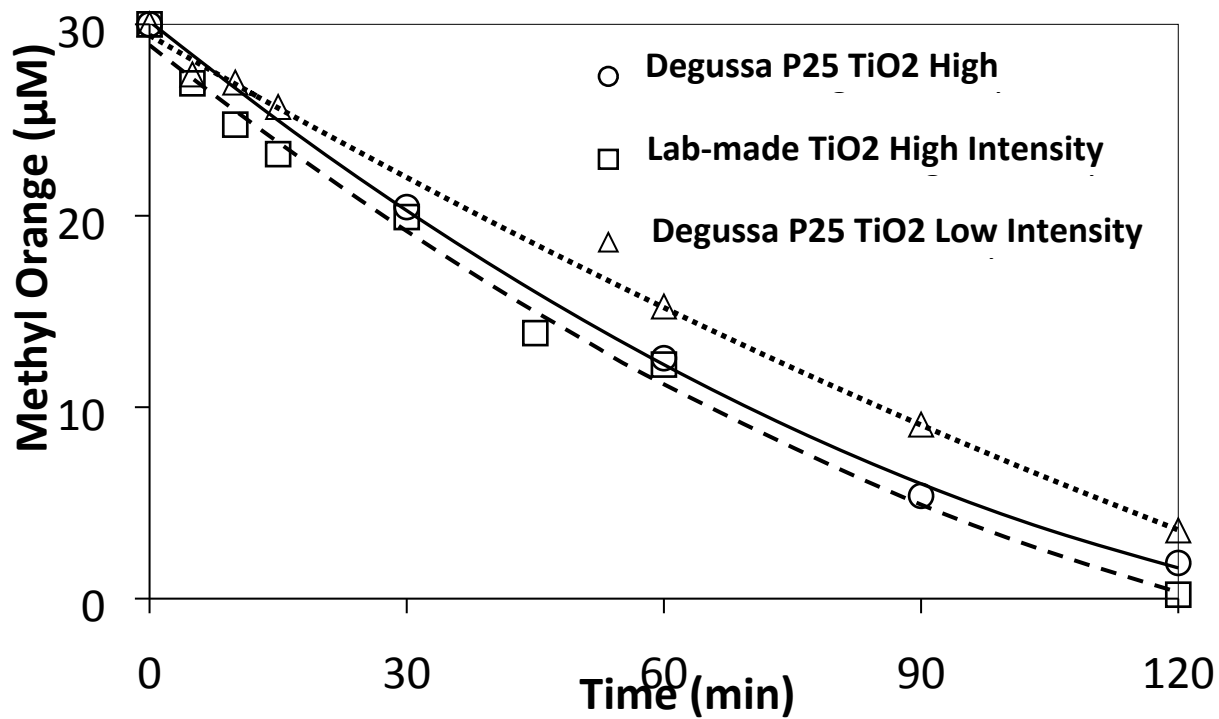

**Fig. S. 6.** Comparison of Degussa P25 TiO<sub>2</sub> and lab-made TiO<sub>2</sub> for the photocatalytic degradation of methyl orange in water under high and low intensity simulated solar light. Water: 100 mL, initial methyl orange concentration: 30  $\mu\text{M}$ , Degussa P25 TiO<sub>2</sub> or lab-made TiO<sub>2</sub>: 1 g/L.

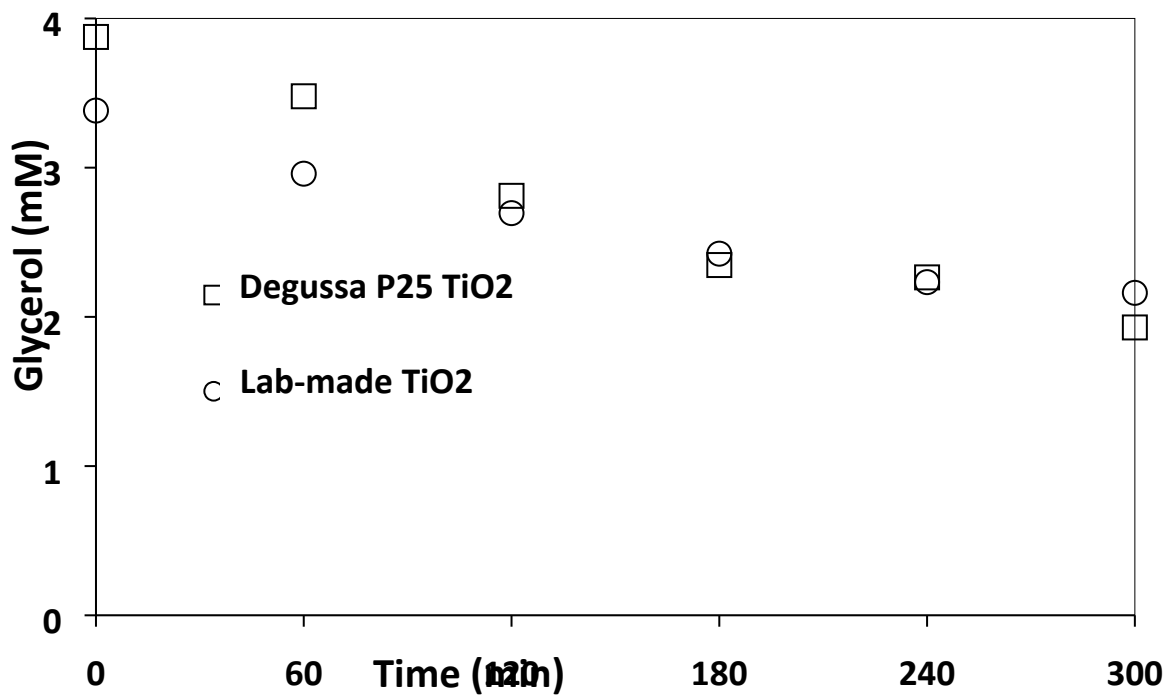

**Fig. S. 7.** Degradation of glycerol in water with Degussa P25 TiO<sub>2</sub> or lab-made TiO<sub>2</sub> under low intensity simulated solar light. Water: 100 mL, glycerol concentration: 4 mM, Degussa P25 TiO<sub>2</sub> or lab-made TiO<sub>2</sub>:

1 g/L.



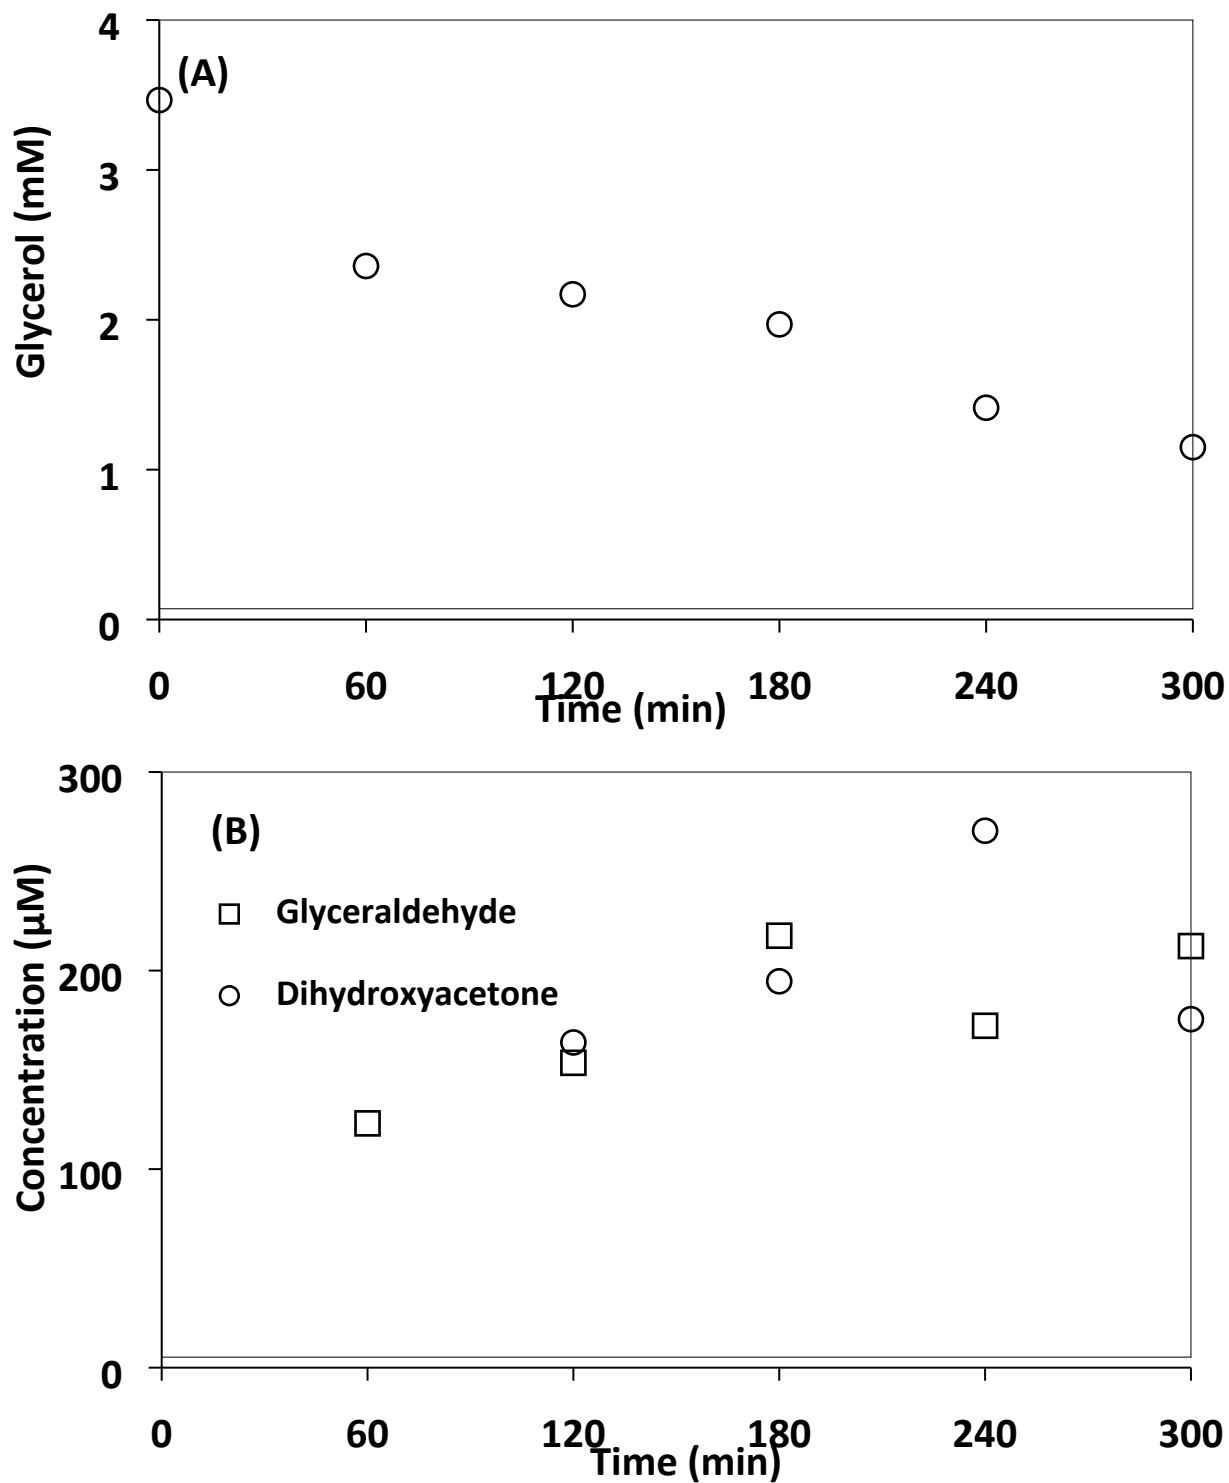

**Fig. S. 8.** (A) Degradation of glycerol, and (B) generation of dihydroxyacetone (DHA) glyceraldehyde (GAD) in acetonitrile with Degussa P25  $\text{TiO}_2$  under low intensity simulated solar light. Acetonitrile: 100 mL, glycerol concentration: 4 mM, Degussa P25  $\text{TiO}_2$ : 1 g/L.

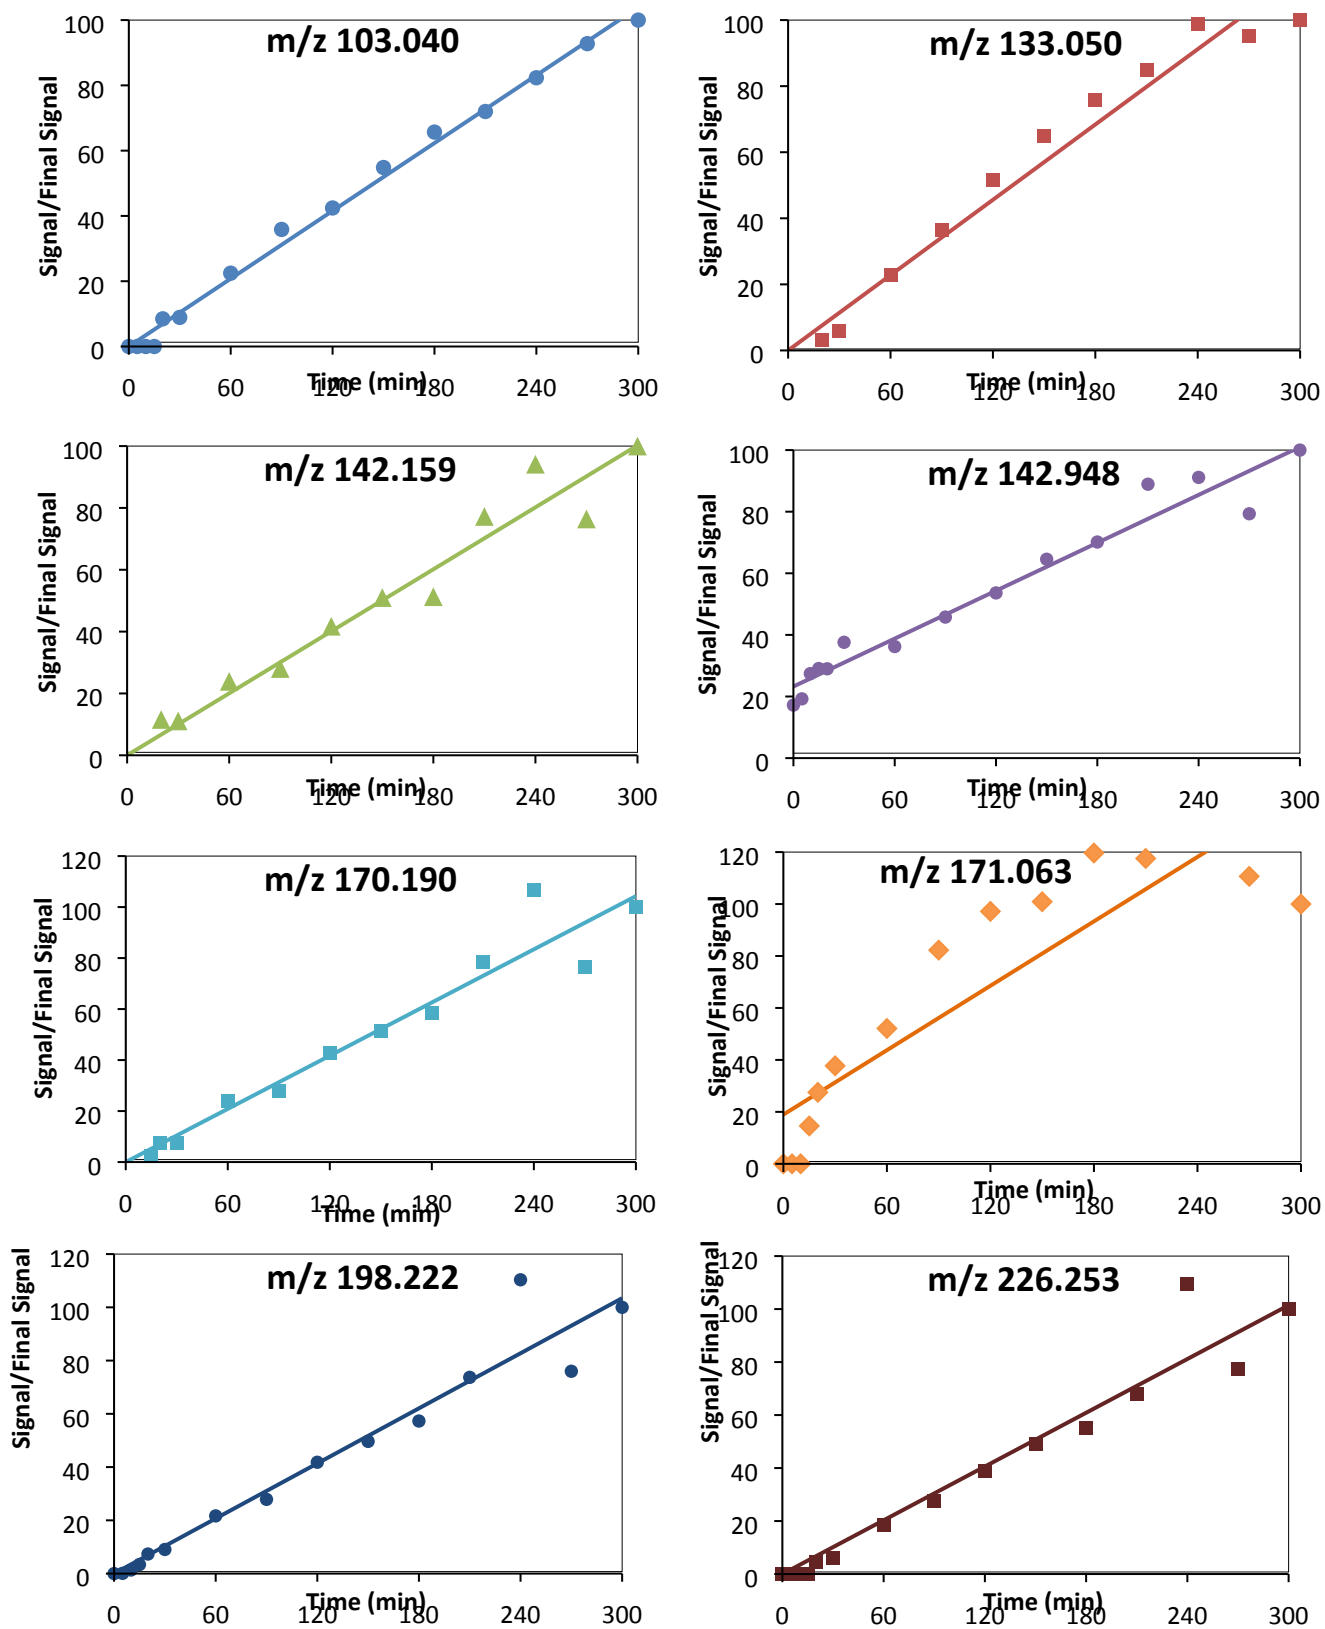

**Fig. S. 9.** The HPLC-MS signal showing the generation of various species over time during the photocatalytic reaction of glycerol in acetonitrile under solar simulated light.
